# Supplementary material
Source: Springer Nature journal article supplement (https://www.springermedizin.de/resource/supplementary/12985_2014_2401_MOESM5_ESM.pdf/9607034)

## A Transfection in Huh-7 cells

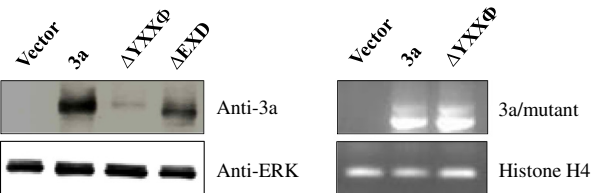

## B In vitro transcription - translation

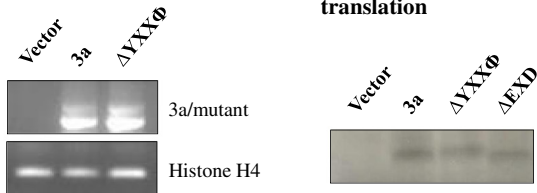

## C

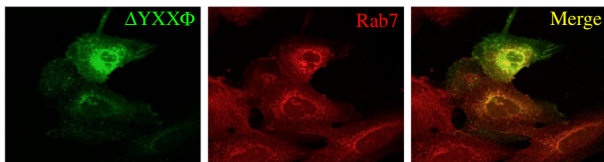

## D

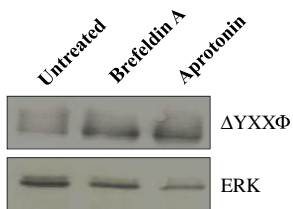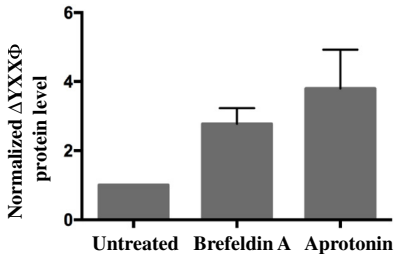

Supplement: MOESM5 [file 9607034]
